# Supplementary material for: Recent Advances in SARS-CoV-2 Main Protease Inhibitors: From Nirmatrelvir to Future Perspectives
Source: MDPI journal article supplement (doi:10.3390/biom13091339), 2023-09-02
Supplement: s1 [file s1]

Supplementary Material for:

# Recent Advances in SARS-CoV-2 Main Protease Inhibitors: From Nirmatrelvir to Future Perspectives

**Table S1.** Most relevant SARS-CoV-2 M<sup>pro</sup> inhibitors discovered so far.

| Compound          | Chemical class                         | Structure                                                                            | IC <sub>50</sub> (nM) <sup>a</sup> | Mechanism              | EC <sub>50</sub> (μM) <sup>c</sup> | Discovery method  | References |
|-------------------|----------------------------------------|--------------------------------------------------------------------------------------|------------------------------------|------------------------|------------------------------------|-------------------|------------|
| 1<br>NIRMATRELVIR | Nitriles                               | 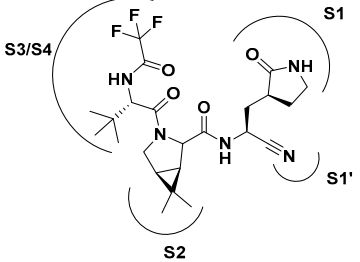   | 3.11 <sup>b</sup>                  | Covalent<br>Reversible | 0.075                              | Lead optimization | [1]        |
| 2<br>PF-00835231  | Hydroxy ketones                        |   | 4 <sup>b</sup>                     | Covalent<br>Reversible | 0.23                               | Drug repurposing  | [1]        |
| 3<br>PF-07304814  | Hydroxy ketones<br>(phosphate prodrug) |  | 27.9 <sup>b</sup>                  | Covalent<br>Reversible | 1.4                                | Drug repurposing  | [1]        |

|   |          |                                                                                     |                   |                        |      |                      |     |
|---|----------|-------------------------------------------------------------------------------------|-------------------|------------------------|------|----------------------|-----|
| 4 | Nitriles | 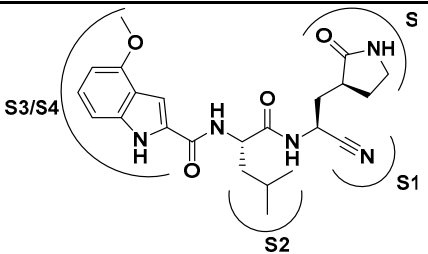  | 27.7 <sup>b</sup> | Covalent<br>Reversible | 1.4  | Lead<br>optimization | [1] |
| 5 | Ketones  |   | 230 <sup>b</sup>  | Covalent<br>Reversible | 5.6  | Lead<br>optimization | [1] |
| 6 | Ketones  |   | 7.93 <sup>b</sup> | Covalent<br>Reversible | 0.9  | Lead<br>optimization | [1] |
| 7 | Ketones  |  | 12.1 <sup>b</sup> | Covalent<br>Reversible | 0.85 | Lead<br>optimization | [1] |

|    |          |                                                                                                                                                                                                                                                                                                                                                                                                                                                                                                                                                            |                |                        |       |                      |     |
|----|----------|------------------------------------------------------------------------------------------------------------------------------------------------------------------------------------------------------------------------------------------------------------------------------------------------------------------------------------------------------------------------------------------------------------------------------------------------------------------------------------------------------------------------------------------------------------|----------------|------------------------|-------|----------------------|-----|
| 8  | Nitriles | 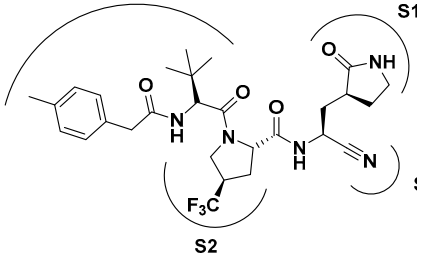 <p>Chemical structure of compound 4b, a nitrile derivative. The structure features a central amide linkage. The left side includes a benzamide moiety with a p-methyl group. The right side includes a nitrile group attached to a pyrrolidine ring. Three regions are highlighted with brackets: S1 (the pyrrolidine ring and its attached nitrile), S2 (the central amide and the adjacent pentafluorophenyl group), and S3/S4 (the benzamide moiety).</p>            | 4 <sup>b</sup> | Covalent<br>Reversible | 0.019 | Lead<br>optimization | [2] |
| 9  | Nitriles |  <p>Chemical structure of compound 9b, a nitrile derivative. The structure features a central amide linkage. The left side includes a benzamide moiety with a p-chloro group. The right side includes a nitrile group attached to a pyrrolidine ring. Three regions are highlighted with brackets: S1 (the pyrrolidine ring and its attached nitrile), S2 (the central amide and the adjacent pentafluorophenyl group), and S3/S4 (the benzamide moiety).</p>            | 9 <sup>b</sup> | Covalent<br>Reversible | 2.2   | Lead<br>optimization | [3] |
| 10 | Nitriles |  <p>Chemical structure of compound 18, a nitrile derivative. The structure features a central amide linkage. The left side includes a benzamide moiety with a p-trifluoromethyl group. The right side includes a nitrile group attached to a pyrrolidine ring. Three regions are highlighted with brackets: S1 (the pyrrolidine ring and its attached nitrile), S2 (the central amide and the adjacent pentafluorophenyl group), and S3/S4 (the benzamide moiety).</p>  | 18             | Covalent<br>Reversible | 0.31  | Lead<br>optimization | [4] |
| 11 | Nitriles |  <p>Chemical structure of compound 22, a nitrile derivative. The structure features a central amide linkage. The left side includes a benzamide moiety with a p-trifluoromethyl group. The right side includes a nitrile group attached to a pyrrolidine ring. Three regions are highlighted with brackets: S1 (the pyrrolidine ring and its attached nitrile), S2 (the central amide and the adjacent pentafluorophenyl group), and S3/S4 (the benzamide moiety).</p> | 22             | Covalent<br>Reversible | 0.17  | Lead<br>optimization | [4] |

|             |          |                                                                                     |                 |                          |      |                      |     |
|-------------|----------|-------------------------------------------------------------------------------------|-----------------|--------------------------|------|----------------------|-----|
| 12<br>BBH-2 | Nitriles | 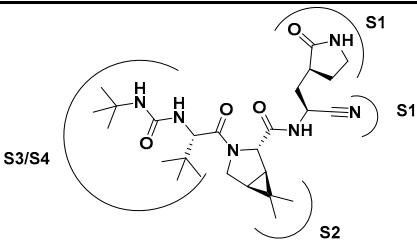  | 26 <sup>d</sup> | Covalent<br>Reversible   | 0.88 | Lead<br>optimization | [5] |
| 13<br>NBH-2 | Nitriles |   | 30 <sup>d</sup> | Covalent<br>Reversible   | 1.82 | Lead<br>optimization | [5] |
| 14          | Alkynes  |   | 140             | Covalent<br>Irreversible | 25.7 | Lead<br>optimization | [6] |
| 15          | Alkynes  |  | 230             | Covalent<br>Irreversible | 5.1  | Lead<br>optimization | [6] |

|              |           |                                                                                                                                                                                                                                                                                                                                             |     |                        |      |                           |     |
|--------------|-----------|---------------------------------------------------------------------------------------------------------------------------------------------------------------------------------------------------------------------------------------------------------------------------------------------------------------------------------------------|-----|------------------------|------|---------------------------|-----|
| 16           | Aldehydes | 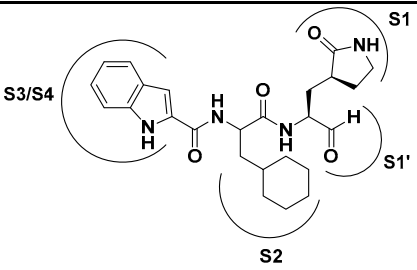 <p>Chemical structure of compound 16. It features a central amide linkage. To the left is an indole ring system (S3/S4). To the right is a pyrrolidine ring (S1) and an aldehyde group (S1'). Below the central amide is a cyclohexane ring (S2).</p>    | 53  | Covalent<br>Reversible | 0.53 | Structure-based<br>design | [7] |
| 17           | Aldehydes |  <p>Chemical structure of compound 17. It is similar to compound 16 but has a fluorine atom on the benzene ring (S2) instead of a cyclohexane ring.</p>                                                                                                   | 40  | Covalent<br>Reversible | 0.72 | Structure-based<br>design | [7] |
| 18           | Aldehydes |  <p>Chemical structure of compound 18. It is similar to compound 16 but has a benzene ring (S2) instead of a cyclohexane ring.</p>                                                                                                                        | 34  | Covalent<br>Reversible | 0.29 | Lead<br>optimization      | [8] |
| 19<br>GC-373 | Aldehydes |  <p>Chemical structure of compound 19 (GC-373). It features a central amide linkage. To the left is a benzyl group (S3/S4). To the right is a pyrrolidine ring (S1) and an aldehyde group (S1'). Below the central amide is a cyclohexane ring (S2).</p> | 400 | Covalent<br>Reversible | 1.5  | Drug<br>repurposing       | [9] |

|                  |                                     |                                                                                      |     |                        |       |                      |      |
|------------------|-------------------------------------|--------------------------------------------------------------------------------------|-----|------------------------|-------|----------------------|------|
| 20<br>GC-376     | Aldehydes<br>(phosphate<br>prodrug) | 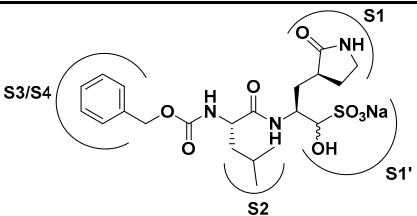   | 190 | Covalent<br>Reversible | 0.9   | Drug<br>repurposing  | [9]  |
| 21               | Aldehydes<br>(phosphate<br>prodrug) |    | 70  | Covalent<br>Reversible | 0.57  | Lead<br>optimization | [10] |
| 22               | Aldehydes<br>(phosphate<br>prodrug) |    | 80  | Covalent<br>Reversible | 0.7   | Lead<br>optimization | [10] |
| 23<br>UAWJ247    | Aldehydes<br>(phosphate<br>prodrug) |   | 45  | Covalent<br>Reversible | 6.8   | Lead<br>optimization | [11] |
| 24<br>Coronastat | Aldehydes<br>(phosphate<br>prodrug) |  | 16  | Covalent<br>Reversible | 0.006 | Lead<br>optimization | [12] |

|                  |           |  |      |                        |       |                           |      |
|------------------|-----------|--|------|------------------------|-------|---------------------------|------|
| 25<br>MI-09      | Aldehydes |  | 15.2 | Covalent<br>Reversible | 0.86  | Structure-based<br>design | [13] |
| 26<br>Mi-23      | Aldehydes |  | 7.6  | Covalent<br>Reversible | n.d.  | Structure-based<br>design | [13] |
| 27<br>MI-30      | Aldehydes |  | 17.2 | Covalent<br>Reversible | 0.54  | Structure-based<br>design | [13] |
| 28               | Aldehydes |  | 180  | Covalent<br>Reversible | 0.035 | Lead<br>optimization      | [14] |
| 29<br>UAWJ9-36-1 | Aldehydes |  | 51   | Covalent<br>Reversible | 2.6   | Rational design           | [15] |

|                  |           |                                                                                      |     |                        |                        |                           |      |
|------------------|-----------|--------------------------------------------------------------------------------------|-----|------------------------|------------------------|---------------------------|------|
| 30<br>UAWJ9-36-3 | Aldehydes | 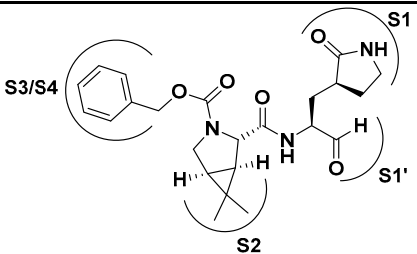   | 54  | Covalent<br>Reversible | 0.37                   | Rational design           | [15] |
| 31<br>MPI143     | Aldehydes |    | 45  | Covalent<br>Reversible | 0.4 – 1.0 <sup>e</sup> | Structure-based<br>design | [16] |
| 32<br>MPI144     | Aldehydes |   | 59  | Covalent<br>Reversible | 0.9 – 2.9 <sup>e</sup> | Structure-based<br>design | [16] |
| 33<br>MPI146     | Aldehydes |  | 120 | Covalent<br>Reversible | 0.8 – 2.3 <sup>e</sup> | Structure-based<br>design | [16] |



|                           |           |                                                                                                                                                                                                                                                                                                                                                                                |       |                        |       |                        |      |
|---------------------------|-----------|--------------------------------------------------------------------------------------------------------------------------------------------------------------------------------------------------------------------------------------------------------------------------------------------------------------------------------------------------------------------------------|-------|------------------------|-------|------------------------|------|
| 34<br>Calpeptin           | Aldehydes | 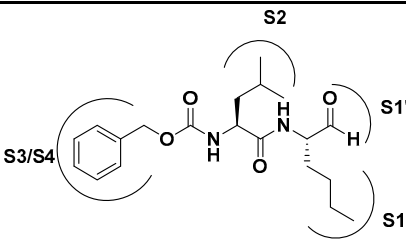 <p>The structure shows Calpeptin with a benzyl ester group. The S1 site is a hydrophobic pocket containing a hydrophobic chain. The S1' site is a hydrophobic pocket containing a hydroxyl group. The S2/S3/S4 sites are a hydrophobic pocket containing a benzyl ester group.</p>          | 10700 | Covalent<br>Reversible | 0.072 | X-ray screening        | [17] |
| 35<br>MPI3                | Aldehydes |  <p>The structure shows MPI3 with a benzyl ester group. The S1 site is a hydrophobic pocket containing a hydroxyl group. The S1' site is a hydrophobic pocket containing a hydroxyl group. The S2/S3/S4 sites are a hydrophobic pocket containing a benzyl ester group.</p>                  | 8.5   | Covalent<br>Reversible | n.d.  | Structure-based design | [18] |
| 36<br>MPI8                | Aldehydes |  <p>The structure shows MPI8 with a benzyl ester group. The S1 site is a hydrophobic pocket containing a hydroxyl group. The S1' site is a hydrophobic pocket containing a hydroxyl group. The S2/S3/S4 sites are a hydrophobic pocket containing a benzyl ester group.</p>                  | 108   | Covalent<br>Reversible | 2.5   | Structure-based design | [18] |
| 37<br>MG1132              | Aldehydes |  <p>The structure shows MG1132 with a benzyl ester group. The S1 site is a hydrophobic pocket containing a hydroxyl group. The S1' site is a hydrophobic pocket containing a hydroxyl group. The S2/S3/S4 sites are a hydrophobic pocket containing a benzyl ester group.</p>               | 7500  | Covalent<br>Reversible | n.d.  | Drug repurposing       | [19] |
| 38<br>Calpain inhibitor I | Aldehydes |  <p>The structure shows Calpain inhibitor I with a benzyl ester group. The S1 site is a hydrophobic pocket containing a hydroxyl group. The S1' site is a hydrophobic pocket containing a hydroxyl group. The S2/S3/S4 sites are a hydrophobic pocket containing a benzyl ester group.</p> | 970   | Covalent<br>Reversible | n.d.  | Drug repurposing       | [11] |

|    |                      |           |                                                                                      |      |                        |       |                        |      |
|----|----------------------|-----------|--------------------------------------------------------------------------------------|------|------------------------|-------|------------------------|------|
| 39 | Calpain inhibitor II | Aldehydes | 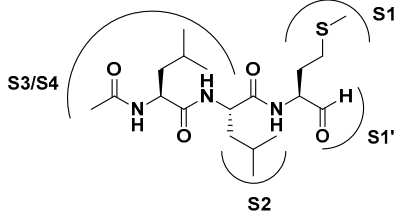   | 8600 | Covalent<br>Reversible | 2.07  | Drug repurposing       | [11] |
| 40 | MPI16                | Aldehydes |    | 105  | Covalent<br>Reversible | 0.056 | Lead optimization      | [20] |
| 41 | MPI17                | Aldehydes |    | 60   | Covalent<br>Reversible | 0.097 | Lead optimization      | [20] |
| 42 |                      | Ketones   |   | 1.0  | Covalent<br>Reversible | 0.16  | Structure-based design | [21] |
| 43 |                      | Ketones   |  | 19.0 | Covalent<br>Reversible | 0.3   | Structure-based design | [21] |
| 44 |                      | Ketones   |  | 14.0 | Covalent<br>Reversible | 0.47  | Structure-based design | [21] |

|              |         |                                                                                      |      |                        |      |                      |      |
|--------------|---------|--------------------------------------------------------------------------------------|------|------------------------|------|----------------------|------|
| 45<br>YH-53  | Ketones | 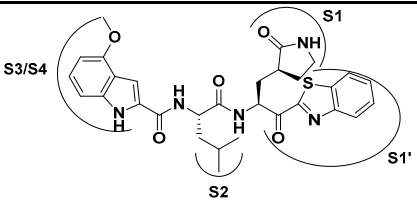   | 130  | Covalent<br>Reversible | 2.6  | Drug<br>repurposing  | [22] |
| 46<br>TKB245 | Ketones |    | 7    | Covalent<br>Reversible | 0.03 | Lead<br>optimization | [23] |
| 47<br>TKB248 | Ketones |    | 74   | Covalent<br>Reversible | 0.22 | Lead<br>optimization | [23] |
| 48           | Ketones |   | 1650 | Covalent<br>Reversible | 0.18 | Lead<br>optimization | [24] |
| 49<br>BBH1   | Ketones |  | n.d. | Covalent<br>Reversible | 16.1 | Lead<br>optimization | [5]  |

|                |               |                                                                                     |       |                          |                   |                                 |      |
|----------------|---------------|-------------------------------------------------------------------------------------|-------|--------------------------|-------------------|---------------------------------|------|
| 50<br>Z-FA-FMK | Ketones       | 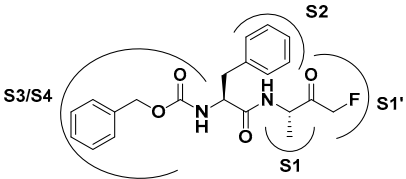  | 11400 | Covalent<br>Irreversible | 0.13              | High<br>throughput<br>screening | [25] |
| 52             | Ketones       |   | n.d.  | Covalent<br>Reversible   | 12.9 <sup>f</sup> | Warhead<br>modification         | [26] |
| 53             | Ketones       |   | 750   | Covalent<br>Reversible   | n.d.              | Structure-based<br>design       | [27] |
| 54<br>X77      | Miscellaneous |  | 4100  | Non<br>Covalent          | n.d.              | n.d.                            | [28] |

|                  |                          |  |     |                          |      |                           |      |
|------------------|--------------------------|--|-----|--------------------------|------|---------------------------|------|
| 55               | $\alpha$ -haloacetamides |  | 410 | Covalent<br>Irreversible | n.d. | Covalent<br>docking       | [28] |
| 56<br>23R        | Miscellaneous            |  | 200 | Non<br>Covalent          | 1.4  | Structure-based<br>design | [29] |
| 57<br>JUN9-62-2R | $\alpha$ -haloacetamides |  | 430 | Covalent<br>Irreversible | 0.90 | Warhead<br>replacemnt     | [30] |

|    |                          |  |     |                          |      |                       |      |
|----|--------------------------|--|-----|--------------------------|------|-----------------------|------|
| 58 | $\alpha$ -haloacetamides |  | 300 | Covalent<br>Irreversible | 2.07 | Warhead<br>replacemnt | [30] |
| 59 | $\alpha$ -haloacetamides |  | 460 | Covalent<br>Irreversible | 1.10 | Warhead<br>replacemnt | [30] |
| 60 | $\alpha$ -haloacetamides |  | 80  | Covalent<br>Irreversible | 0.58 | Warhead<br>replacemnt | [30] |

|                            |                          |                                                                                      |      |                          |      |                                                   |      |
|----------------------------|--------------------------|--------------------------------------------------------------------------------------|------|--------------------------|------|---------------------------------------------------|------|
| 61                         | $\alpha$ -haloacetamides | 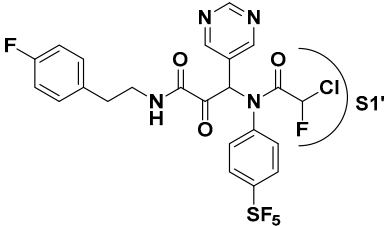   | 56   | Covalent<br>Reversible   | n.d. | Lead<br>optimization                              | [31] |
| 62<br>Y020-9948            | $\alpha$ -haloacetamides |     | 8500 | Covalent<br>Irreversible | n.d. | In silico<br>screening and<br>covalent<br>docking | [32] |
| 63<br>MCULE-<br>5948770040 | Miscellaneous            |    | 4200 | Non<br>Covalent          | n.d. | High<br>throughput<br>screening                   | [33] |
| 64<br>GC-14                | Miscellaneous            |   | 400  | Non<br>Covalent          | 1.1  | Structure-based<br>design                         | [34] |
| 65<br>GD9                  | $\alpha$ -haloacetamides |  | 180  | Covalent<br>Irreversible | 2.6  | Warhead<br>replacement                            | [35] |

|                        |                              |                                                                                      |     |                          |      |                                                                            |      |
|------------------------|------------------------------|--------------------------------------------------------------------------------------|-----|--------------------------|------|----------------------------------------------------------------------------|------|
| 66<br>GD13             | $\alpha$ -<br>haloacetamides | 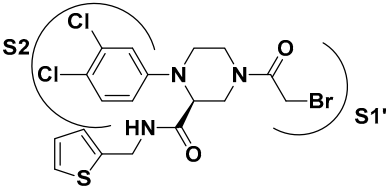   | 310 | Covalent<br>Irreversible | 4.2  | Warhead<br>replacement                                                     | [35] |
| 67<br>(R)-EN82         | $\alpha$ -<br>haloacetamides |     | 530 | Covalent<br>Irreversible | n.d. | Covalent<br>chemoproteomi<br>c strategies and<br>structure-based<br>design | [36] |
| 68<br>HW-2-010b        | $\alpha$ -<br>haloacetamides |     | 14  | Covalent<br>Irreversible | n.d. | Covalent<br>chemoproteomi<br>c strategies and<br>structure-based<br>design | [36] |
| 69<br>QUB-00006-Int-07 | $\alpha$ -<br>haloacetamides |    | 830 | Covalent                 | n.d. | <i>In silico</i><br>strategies                                             | [37] |
| 70                     | $\alpha$ -ketoamides         |  | 670 | Covalent<br>Reversible   | 4-5  | Lead<br>optimization                                                       | [38] |



|               |                      |                                                                                      |                  |                          |                         |                                   |      |
|---------------|----------------------|--------------------------------------------------------------------------------------|------------------|--------------------------|-------------------------|-----------------------------------|------|
| 71<br>Y180    | $\alpha$ -ketoamides | 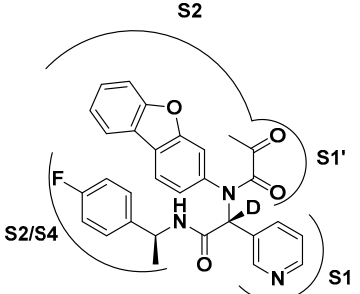   | 8.1              | Covalent<br>Reversible   | 0.011                   | Structure-based<br>design         | [39] |
| 72<br>RAY1216 | $\alpha$ -ketoamides |    | 8.4 <sup>b</sup> | Covalent<br>Reversible   | 0.13                    | Lead<br>optimization              | [40] |
| 73            | $\alpha$ -ketoamides |   | 1300             | Covalent<br>Reversible   | n.d.                    | <i>In vitro</i><br>screening      | [41] |
| 74<br>SY110   | $\alpha$ -ketoamides |  | 14.4             | Covalent<br>Reversible   | 0.38 – 2.8 <sup>c</sup> | Lead<br>optimization              | [41] |
| 75<br>N3      | Michael<br>Acceptors |  | n.d.             | Covalent<br>Irreversible | 16.8                    | Computer-<br>aided drug<br>design | [42] |

|                  |                      |  |                  |                          |      |                              |      |
|------------------|----------------------|--|------------------|--------------------------|------|------------------------------|------|
| 76<br>CINANSERIN | Michael<br>Acceptors |  | 125000           | Covalent<br>Irreversible | 20.6 | Virtual<br>screening         | [42] |
| 77               | Michael<br>Acceptors |  | 151              | Covalent<br>Irreversible | 2.9  | <i>In vitro</i><br>screening | [43] |
| 78               | Michael<br>Acceptors |  | 47200            | Covalent<br>Irreversible | n.d. | Virtual<br>screening         | [44] |
| 79               | Michael<br>Acceptors |  | 157000           | Covalent<br>Irreversible | n.d. | Virtual<br>screening         | [44] |
| 80<br>SPR38      | Michael<br>Acceptors |  | 260 <sup>b</sup> | Covalent<br>Irreversible | 18.5 | Lead<br>optimization         | [45] |
| 81<br>SPR39      | Michael<br>Acceptors |  | 250 <sup>b</sup> | Covalent<br>Irreversible | 1.5  | Lead<br>optimization         | [45] |

|             |                      |                                                                                      |                  |                          |                  |                        |      |
|-------------|----------------------|--------------------------------------------------------------------------------------|------------------|--------------------------|------------------|------------------------|------|
| 82<br>SPR41 | Michael<br>Acceptors | 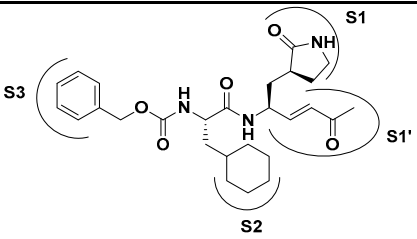   | 180 <sup>b</sup> | Covalent<br>Irreversible | 1.8              | Lead<br>optimization   | [45] |
| 83<br>SM141 | Michael<br>Acceptors |    | 900              | Covalent<br>Irreversible | 0.0082           | Lead<br>optimization   | [46] |
| 84<br>SM142 | Michael<br>Acceptors |    | 1800             | Covalent<br>Irreversible | 0.0147           | Lead<br>optimization   | [46] |
| 85          | Michael<br>Acceptors |   | 1900             | Covalent<br>Irreversible | n.d.             | Warhead<br>replacement | [47] |
| 86          | Michael<br>Acceptors |  | 14000            | Covalent<br>Irreversible | 5.3 <sup>f</sup> | Warhead<br>replacement | [47] |
| 87          | Michael<br>Acceptors |  | 12400            | Covalent<br>Irreversible | 9.1 <sup>s</sup> | Warhead<br>replacement | [47] |

|    |                      |                                                                                     |       |                          |                   |                        |      |
|----|----------------------|-------------------------------------------------------------------------------------|-------|--------------------------|-------------------|------------------------|------|
| 88 | Michael<br>Acceptors | 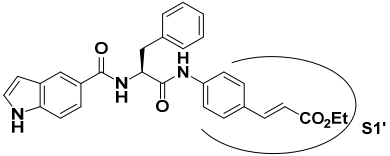  | 10100 | Covalent<br>Irreversible | 10.1 <sup>s</sup> | Warhead<br>replacement | [47] |
| 89 | Michael<br>Acceptors |    | 420   | Covalent<br>Irreversible | n.d.              | Covalent<br>docking    | [28] |
| 90 | Michael<br>Acceptors |   | 170   | Covalent<br>Irreversible | n.d.              | Covalent<br>docking    | [28] |
| 92 | Michael<br>Acceptors |  | 2860  | Covalent<br>Irreversible | n.d.              | Automatic<br>pipeline  | [48] |

|                 |                      |                                                                                      |           |                          |      |                                   |      |
|-----------------|----------------------|--------------------------------------------------------------------------------------|-----------|--------------------------|------|-----------------------------------|------|
| 93<br>MYRECITIN | Michael<br>Acceptors | 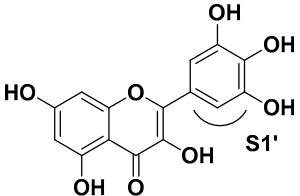   | 200 - 600 | Covalent<br>Irreversible | 8    | in Vitro<br>Repurposing<br>Screen | [49] |
| 94              | Michael<br>Acceptors |    | 300       | Covalent<br>Irreversible | 12.6 | Structure-based<br>optimization   | [50] |
| 95              | Michael<br>Acceptors |    | 260       | Covalent<br>Irreversible | 11.5 | Structure-based<br>optimization   | [50] |
| 96              | Michael<br>Acceptors |    | 3100      | Covalent<br>Irreversible | 3.2  | Structure-based<br>optimization   | [50] |
| 97<br>GRL-0920  | Esters               |    | 250       | Covalent<br>Irreversible | 2.8  | Drug<br>repurposing               | [51] |
| 98<br>GRL-0820  | Esters               |  | 73        | Covalent<br>Irreversible | 15   | Structure-based<br>design         | [51] |

|                |            |                                                                                      |      |                          |      |                                                   |      |
|----------------|------------|--------------------------------------------------------------------------------------|------|--------------------------|------|---------------------------------------------------|------|
| 99<br>GRL-1720 | Esters     | 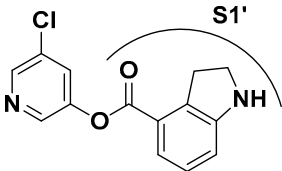    | 320  | Covalent<br>Irreversible | 15   | Lead<br>optimization                              | [52] |
| 100            | Esters     |     | 55   | Covalent<br>Irreversible | n.d. | Lead<br>optimization                              | [53] |
| 101            | Esters     |     | 34   | Covalent<br>Irreversible | n.d. | Lead<br>optimization                              | [53] |
| 102            | Esters     |     | 81   | Covalent<br>Irreversible | n.d. | <i>In vitro</i><br>screening                      | [43] |
| 103            | Thioesters |    | 11   | Covalent<br>Irreversible | 0.11 | Virtual<br>screening<br>Structure-based<br>design | [54] |
| 104            | Thioesters |   | 88   | Covalent<br>Irreversible | 0.73 | Virtual<br>screening<br>Structure-based<br>design | [54] |
| 105            | Thioesters |  | n.d. | n.d.                     | 0.1  | Virtual<br>screening<br>Structure-based<br>design | [54] |

|                |                          |                                                                                     |      |          |       |                                             |      |
|----------------|--------------------------|-------------------------------------------------------------------------------------|------|----------|-------|---------------------------------------------|------|
| 106            | Thioesters               | 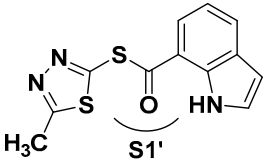   | n.d. | n.d.     | 0.44  | Virtual screening<br>Structure-based design | [54] |
| 107            | Thioesters               |   | n.d. | n.d.     | 0.66  | Virtual screening<br>Structure-based design | [54] |
| 108            | Thioesters               |    | n.d. | n.d.     | 0.038 | Virtual screening<br>Structure-based design | [54] |
| 109            | Thioesters               |    | n.d. | n.d.     | 0.045 | Virtual screening<br>Structure-based design | [54] |
| 110<br>EBSELEN | Selenium-based compounds |   | 670  | Covalent | 4.67  | Drug repurposing                            | [42] |
| 111            | Selenium-based compounds |  | 25.7 | Covalent | n.d.  | <i>In vitro</i> screening                   | [55] |
| 112            | Selenium-based compounds |  | 27.9 | Covalent | n.d.  | <i>In vitro</i> screening                   | [55] |

|     |                          |                                                                                     |      |          |      |                           |      |
|-----|--------------------------|-------------------------------------------------------------------------------------|------|----------|------|---------------------------|------|
| 113 | Selenium-based compounds | 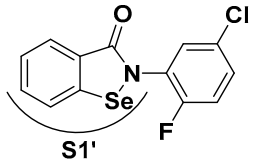   | 15.2 | Covalent | n.d. | <i>In vitro</i> screening | [55] |
| 114 | Selenium-based compounds |    | 27.4 | Covalent | n.d. | <i>In vitro</i> screening | [55] |
| 115 | Selenium-based compounds |   | 900  | Covalent | 11.2 | Structure-based design    | [56] |
| 116 | Selenium-based compounds |    | 680  | Covalent | 11.7 | Structure-based design    | [56] |
| 117 | Selenium-based compounds |   | 640  | Covalent | 18.2 | Structure-based design    | [56] |
| 118 | Selenium-based compounds |  | 380  | Covalent | 2.0  | Structure-based design    | [56] |
| 119 | Selenium-based compounds |  | 2800 | Covalent | 0.8  | Structure-based design    | [56] |



|                 |                             |                                                                                      |     |          |      |                              |      |
|-----------------|-----------------------------|--------------------------------------------------------------------------------------|-----|----------|------|------------------------------|------|
| 120<br>MR6-7-2  | Selenium-based<br>compounds | 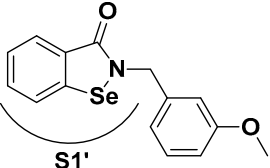    | 360 | Covalent | 4.5  | Drug<br>repurposing          | [57] |
| 121<br>MR6-18-4 | Selenium-based<br>compounds |    | 340 | Covalent | 3.7  | Drug<br>repurposing          | [57] |
| 122<br>MR6-17-1 | Selenium-based<br>compounds |    | 700 | Covalent | n.a. | Drug<br>repurposing          | [57] |
| 123<br>MR6-26-2 | Selenium-based<br>compounds |     | 470 | Covalent | 3.2  | Drug<br>repurposing          | [57] |
| 124<br>MR6-31-2 | Selenium-based<br>compounds |    | 820 | Covalent | 1.8  | Drug<br>repurposing          | [57] |
| 125<br>EBSULFUR | Sulfur-based<br>compounds   |   | 490 | Covalent | n.d. | <i>In vitro</i><br>screening | [58] |
| 126             | Sulfur-based<br>compounds   |  | 110 | Covalent | n.d. | <i>In vitro</i><br>screening | [58] |

|     |                          |                                                                                      |     |          |      |                           |      |
|-----|--------------------------|--------------------------------------------------------------------------------------|-----|----------|------|---------------------------|------|
| 127 | Selenium-based compounds | 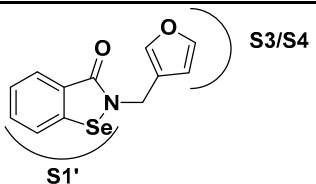   | 74  | Covalent | n.d. | <i>In vitro</i> screening | [58] |
| 128 | Sulfur-based compounds   |    | 190 | Covalent | n.d. | high-throughput screening | [59] |
| 129 | Sulfur-based compounds   |     | 160 | Covalent | n.d. | Lead optimization         | [59] |
| 130 | Sulfur-based compounds   |     | 180 | Covalent | n.d. | Lead optimization         | [59] |
| 131 | Sulfur-based compounds   |   | 140 | Covalent | n.d. | Lead optimization         | [59] |
| 132 | Sulfur-based compounds   |  | 150 | Covalent | n.d. | Lead optimization         | [59] |

|     |                        |                                                                                            |     |          |      |                   |      |
|-----|------------------------|--------------------------------------------------------------------------------------------|-----|----------|------|-------------------|------|
| 133 | Sulfur-based compounds | 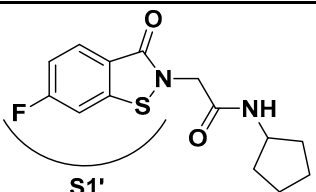<br>S1'  | 150 | Covalent | n.d. | Lead optimization | [59] |
| 134 | Sulfur-based compounds | <br>S1'  | 120 | Covalent | n.d. | Lead optimization | [59] |
| 135 | Sulfur-based compounds | <br>S1'  | 116 | Covalent | n.d. | Lead optimization | [59] |
| 136 | Sulfur-based compounds | <br>S1'  | 165 | Covalent | n.d. | Lead optimization | [59] |
| 137 | Sulfur-based compounds | <br>S1' | 165 | Covalent | n.d. | Lead optimization | [59] |

|                    |               |                                                                                      |      |                 |                         |                                       |      |
|--------------------|---------------|--------------------------------------------------------------------------------------|------|-----------------|-------------------------|---------------------------------------|------|
| 138                | Miscellaneous | 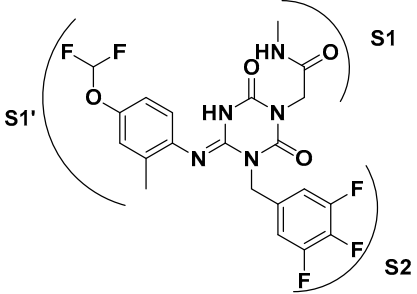   | 8600 | Non<br>Covalent | n.d.                    | Virtual and <i>in vitro</i> screening | [60] |
| 139                | Miscellaneous |    | 96   | Non<br>Covalent | 12.5                    | Lead optimization                     | [60] |
| 140<br>S-217622    | Miscellaneous |   | 13   | Non<br>Covalent | 0.5 – 0.29 <sup>e</sup> | Lead optimization                     | [60] |
| 141<br>Z1244904919 | Miscellaneous |  | 730  | Non<br>Covalent | 5                       | Virtual and <i>in vitro</i> screening | [61] |
| 142<br>Z1759961356 | Miscellaneous |  | 690  | Non<br>Covalent | 8.5                     | Virtual and <i>in vitro</i> screening | [61] |

|                             |               |                                                                                                                                                                                                                                                                                                                                                                  |       |                 |      |                                       |      |
|-----------------------------|---------------|------------------------------------------------------------------------------------------------------------------------------------------------------------------------------------------------------------------------------------------------------------------------------------------------------------------------------------------------------------------|-------|-----------------|------|---------------------------------------|------|
| 144<br>CCF981               | Miscellaneous | 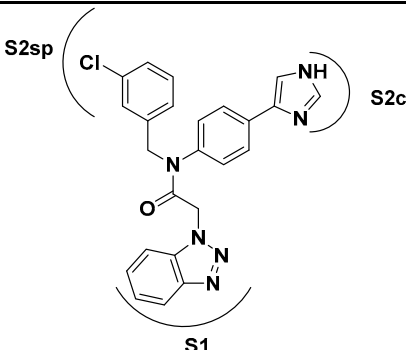 <p>Chemical structure of CCF981, a triazole derivative. The structure features a central benzene ring connected to a triazole ring (S1) and a 4-chlorophenyl group (S2sp). A side chain (S2c) is also present, consisting of a benzene ring connected to a triazole ring.</p> | 68    | Non<br>Covalent | 0.5  | Lead<br>optimization                  | [62] |
| 145                         | Miscellaneous |  <p>Chemical structure of a complex molecule, likely a derivative of a nucleoside or nucleotide, featuring a purine-like core and a thiazole ring.</p>                                                                                                                         | 450   | Non<br>Covalent | 0.77 | Virtual and <i>in vitro</i> screening | [63] |
| 146                         | Miscellaneous |  <p>Chemical structure of a complex molecule, likely a derivative of a nucleoside or nucleotide, featuring a purine-like core and a thiazole ring.</p>                                                                                                                         | 110   | Non<br>Covalent | 0.11 | Virtual and <i>in vitro</i> screening | [63] |
| 149                         | Miscellaneous |  <p>Chemical structure of a complex molecule, likely a derivative of a nucleoside or nucleotide, featuring a purine-like core and a thiazole ring.</p>                                                                                                                        | 77    | Non<br>Covalent | 0.11 | Lead<br>optimization                  | [64] |
| 150<br>ZINC00037365906<br>0 | Miscellaneous |  <p>Chemical structure of a complex molecule, likely a derivative of a nucleoside or nucleotide, featuring a purine-like core and a thiazole ring.</p>                                                                                                                        | 58000 | Non<br>Covalent | n.d. | Virtual<br>screening                  | [65] |

|                             |               |                                                                                     |       |                 |      |                      |      |
|-----------------------------|---------------|-------------------------------------------------------------------------------------|-------|-----------------|------|----------------------|------|
| 151<br>ZINC00063641650<br>1 | Miscellaneous | 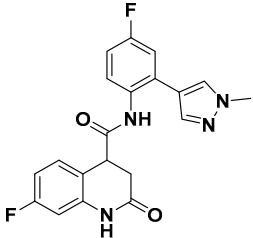   | 93000 | Non<br>Covalent | n.d. | Virtual<br>screening | [65] |
| 152<br>Z228770960           | Miscellaneous |    | 4000  | Non<br>Covalent | n.d. | Virtual<br>screening | [65] |
| 153<br>Z393665558           | Miscellaneous |    | 6000  | Non<br>Covalent | n.d. | Virtual<br>screening | [65] |
| 154<br>Z225602086           | Miscellaneous |   | 7400  | Non<br>Covalent | n.d. | Virtual<br>screening | [65] |
| 155<br>Z222979552           | Miscellaneous |  | 1000  | Non<br>Covalent | n.d. | Virtual<br>screening | [65] |

|                   |               |                                                                                     |      |                 |      |                           |      |
|-------------------|---------------|-------------------------------------------------------------------------------------|------|-----------------|------|---------------------------|------|
| 156<br>Z228166018 | Miscellaneous | 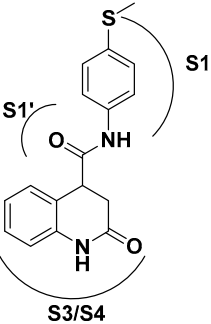   | 1600 | Non<br>Covalent | n.d. | Virtual<br>screening      | [65] |
| 157<br>Z222977344 | Miscellaneous |    | 2000 | Non<br>Covalent | n.d. | Virtual<br>screening      | [65] |
| 158<br>Z222978028 | Miscellaneous |   | 5800 | Non<br>Covalent | n.d. | Virtual<br>screening      | [65] |
| 160               | Miscellaneous |  | 83   | Non<br>Covalent | 1.1  | Structure-based<br>design | [66] |

|                       |               |                                                                                     |      |              |      |                           |      |
|-----------------------|---------------|-------------------------------------------------------------------------------------|------|--------------|------|---------------------------|------|
| 161                   | Miscellaneous | 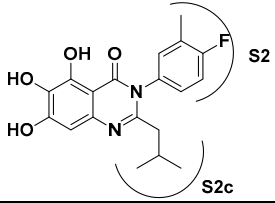   | 100  | Non Covalent | 2.1  | Structure-based design    | [66] |
| 162                   | Miscellaneous |   | 4100 | Non Covalent | n.d. | Warhead replacement       | [67] |
| 163<br>Neoechinulin A | Miscellaneous |    | 470  | Non Covalent | n.d. | <i>in vitro</i> screening | [68] |
| 164<br>Shikonin       | Miscellaneous |    | 1570 | Non Covalent | n.d. | Virtual screening         | [69] |
| 165<br>C1             | Miscellaneous |  | 1500 | Non Covalent | n.d. | Lead optimization         | [70] |
| 166<br>C2             | Miscellaneous |  | 1800 | Non Covalent | n.d. | Lead optimization         | [70] |



|                   |               |                                                                                      |      |            |      |                                     |      |
|-------------------|---------------|--------------------------------------------------------------------------------------|------|------------|------|-------------------------------------|------|
| 167<br>Pelitinib  | Miscellaneous | 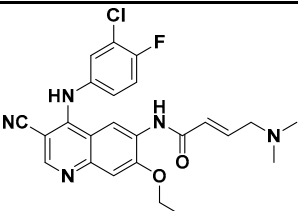   | n.d. | Allosteric | 1.25 | X-ray screening<br>Drug repurposing | [17] |
| 168<br>Ifenprodil | Miscellaneous |    | n.d. | Allosteric | 47   | X-ray screening<br>Drug repurposing | [17] |
| 169<br>RS-102895  | Miscellaneous |    | n.d. | Allosteric | 19.8 | X-ray screening<br>Drug repurposing | [17] |
| 170<br>AT7519     | Miscellaneous |     | n.d. | Allosteric | 25.2 | X-ray screening<br>Drug repurposing | [17] |
| 171<br>JMX0286    | Miscellaneous |   | 4800 | Allosteric | 2.3  | <i>In vitro</i> screening           | [71] |
| 172<br>JMX0301    | Miscellaneous |  | 4500 | Allosteric | 2.4  | <i>In vitro</i> screening           | [71] |
| 173<br>JMX0941    | Miscellaneous |   | 3900 | Allosteric | 1.7  | <i>In vitro</i> screening           | [71] |

|     |               |                                                                                   |     |            |     |                  |      |
|-----|---------------|-----------------------------------------------------------------------------------|-----|------------|-----|------------------|------|
| 174 | Miscellaneous | 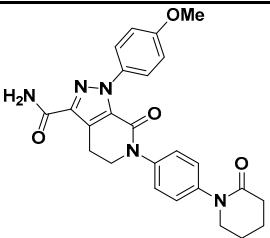 | 9.7 | Allosteric | 1.8 | Drug repurposing | [72] |
|-----|---------------|-----------------------------------------------------------------------------------|-----|------------|-----|------------------|------|

## References

- [1] D. R. Owen *et al.*, 'An oral SARS-CoV-2 M<sup>pro</sup> inhibitor clinical candidate for the treatment of COVID-19', *Science* (1979), vol. 374, no. 6575, pp. 1586–1593, Dec. 2021, doi: 10.1126/science.abl4784.
- [2] 'WO2021250648A1 - Nitrile-containing antiviral compounds - Google Patents'. <https://patents.google.com/patent/WO2021250648A1/en> (accessed Mar. 05, 2023).
- [3] B. Bai *et al.*, 'Peptidomimetic nitrile warheads as SARS-CoV-2 3CL protease inhibitors', *RSC Med Chem*, vol. 12, no. 10, pp. 1722–1730, 2021, doi: 10.1039/D1MD00247C.
- [4] M. Zhu *et al.*, 'Design, synthesis and biological evaluation of covalent peptidomimetic 3CL protease inhibitors containing nitrile moiety', *Bioorg Med Chem*, vol. 87, p. 117316, May 2023, doi: 10.1016/J.BMC.2023.117316.
- [5] D. W. Kneller *et al.*, 'Covalent narlaprevir- and boceprevir-derived hybrid inhibitors of SARS-CoV-2 main protease', *Nat Commun*, vol. 13, no. 1, p. 2268, Apr. 2022, doi: 10.1038/s41467-022-29915-z.
- [6] L. Brewitz *et al.*, 'Alkyne Derivatives of SARS-CoV-2 Main Protease Inhibitors Including Nirmatrelvir Inhibit by Reacting Covalently with the Nucleophilic Cysteine', *J Med Chem*, vol. 66, no. 4, pp. 2663–2680, Feb. 2023, doi: 10.1021/acs.jmedchem.2c01627.
- [7] W. Dai *et al.*, 'Structure-based design of antiviral drug candidates targeting the SARS-CoV-2 main protease', *Science* (1979), vol. 368, no. 6497, pp. 1331–1335, Jun. 2020, doi: 10.1126/science.abb4489.
- [8] W. Dai *et al.*, 'Design, Synthesis, and Biological Evaluation of Peptidomimetic Aldehydes as Broad-Spectrum Inhibitors against Enterovirus and SARS-CoV-2', *J Med Chem*, vol. 65, no. 4, pp. 2794–2808, Feb. 2022, doi: 10.1021/acs.jmedchem.0c02258.
- [9] W. Vuong *et al.*, 'Feline coronavirus drug inhibits the main protease of SARS-CoV-2 and blocks virus replication', *Nat Commun*, vol. 11, no. 1, p. 4282, Aug. 2020, doi: 10.1038/s41467-020-18096-2.
- [10] W. Vuong *et al.*, 'Improved SARS-CoV-2 M<sup>pro</sup> inhibitors based on feline antiviral drug GC376: Structural enhancements, increased solubility, and micellar studies', *Eur J Med Chem*, vol. 222, p. 113584, Oct. 2021, doi: 10.1016/j.ejmech.2021.113584.
- [11] M. D. Sacco *et al.*, 'Structure and inhibition of the SARS-CoV-2 main protease reveal strategy for developing dual inhibitors against M<sup>pro</sup> and cathepsin L', *Sci Adv*, vol. 6, no. 50, Dec. 2020, doi: 10.1126/SCIADV.ABE0751/SUPPL\_FILE/ABE0751\_SM.PDF.
- [12] H. Liu *et al.*, 'Development of optimized drug-like small molecule inhibitors of the SARS-CoV-2 3CL protease for treatment of COVID-19', *Nat Commun*, vol. 13, no. 1, p. 1891, Apr. 2022, doi: 10.1038/s41467-022-29413-2.
- [13] J. Qiao *et al.*, 'SARS-CoV-2 M<sup>pro</sup> inhibitors with antiviral activity in a transgenic mouse model', *Science* (1979), vol. 371, no. 6536, pp. 1374–1378, Mar. 2021, doi: 10.1126/science.abf1611.

- [14] C. S. Dampalla *et al.*, 'Structure-Guided Design of Conformationally Constrained Cyclohexane Inhibitors of Severe Acute Respiratory Syndrome Coronavirus-2 3CL Protease', *J Med Chem*, vol. 64, no. 14, pp. 10047–10058, Jul. 2021, doi: 10.1021/acs.jmedchem.1c00319.
- [15] Z. Xia *et al.*, 'Rational Design of Hybrid SARS-CoV-2 Main Protease Inhibitors Guided by the Superimposed Cocrystal Structures with the Peptidomimetic Inhibitors GC-376, Telaprevir, and Boceprevir', *ACS Pharmacol Transl Sci*, vol. 4, no. 4, pp. 1408–1421, Aug. 2021, doi: 10.1021/acsptsci.1c00099.
- [16] Y. R. Alugubelli *et al.*, 'A systematic exploration of boceprevir-based main protease inhibitors as SARS-CoV-2 antivirals', *Eur J Med Chem*, vol. 240, p. 114596, Oct. 2022, doi: 10.1016/j.ejmech.2022.114596.
- [17] S. Günther *et al.*, 'X-ray screening identifies active site and allosteric inhibitors of SARS-CoV-2 main protease', *Science (1979)*, vol. 372, no. 6542, pp. 642–646, May 2021, doi: 10.1126/science.abf7945.
- [18] K. S. Yang *et al.*, 'A Quick Route to Multiple Highly Potent SARS-CoV-2 Main Protease Inhibitors\*\*', *ChemMedChem*, vol. 16, no. 6, pp. 942–948, Mar. 2021, doi: 10.1002/cmdc.202000924.
- [19] E. Costanzi *et al.*, 'Structural and Biochemical Analysis of the Dual Inhibition of MG-132 against SARS-CoV-2 Main Protease (Mpro/3CLpro) and Human Cathepsin-L', *Int J Mol Sci*, vol. 22, no. 21, p. 11779, Oct. 2021, doi: 10.3390/ijms222111779.
- [20] Y. Ma *et al.*, 'A multi-pronged evaluation of aldehyde-based tripeptidyl main protease inhibitors as SARS-CoV-2 antivirals', *Eur J Med Chem*, vol. 240, p. 114570, Oct. 2022, doi: 10.1016/j.ejmech.2022.114570.
- [21] B. Bai *et al.*, 'Peptidomimetic  $\alpha$ -Acyloxymethylketone Warheads with Six-Membered Lactam P1 Glutamine Mimic: SARS-CoV-2 3CL Protease Inhibition, Coronavirus Antiviral Activity, and *in Vitro* Biological Stability', *J Med Chem*, vol. 65, no. 4, pp. 2905–2925, Feb. 2022, doi: 10.1021/acs.jmedchem.1c00616.
- [22] S. Hattori *et al.*, 'A small molecule compound with an indole moiety inhibits the main protease of SARS-CoV-2 and blocks virus replication', *Nat Commun*, vol. 12, no. 1, p. 668, Jan. 2021, doi: 10.1038/s41467-021-20900-6.
- [23] N. Higashi-Kuwata *et al.*, 'Identification of SARS-CoV-2 Mpro inhibitors containing P1' 4-fluorobenzothiazole moiety highly active against SARS-CoV-2', *Nat Commun*, vol. 14, no. 1, p. 1076, Feb. 2023, doi: 10.1038/s41467-023-36729-0.
- [24] H. Yang *et al.*, 'Design, synthesis and biological evaluation of peptidomimetic benzothiazolyl ketones as 3CLpro inhibitors against SARS-CoV-2', *Eur J Med Chem*, vol. 257, p. 115512, Sep. 2023, doi: 10.1016/J.EJMECH.2023.115512.
- [25] W. Zhu *et al.*, 'Identification of SARS-CoV-2 3CL Protease Inhibitors by a Quantitative High-Throughput Screening', *ACS Pharmacol Transl Sci*, vol. 3, no. 5, pp. 1008–1016, Oct. 2020, doi: 10.1021/acsptsci.0c00108.
- [26] A. Citarella *et al.*, 'Pseudo-Dipeptide Bearing  $\alpha,\alpha$ -Difluoromethyl Ketone Moiety as Electrophilic Warhead with Activity against Coronaviruses', *International Journal of Molecular Sciences* 2021, Vol. 22, Page 1398, vol. 22, no. 3, p. 1398, Jan. 2021, doi: 10.3390/IJMS22031398.
- [27] D. Shcherbakov *et al.*, 'Design and Evaluation of Bispidine-Based SARS-CoV-2 Main Protease Inhibitors', *ACS Med Chem Lett*, vol. 13, no. 1, pp. 140–147, Jan. 2022, doi: 10.1021/acsmedchemlett.1c00299.
- [28] J. K. Stille *et al.*, 'Design, synthesis and in vitro evaluation of novel SARS-CoV-2 3CLpro covalent inhibitors', *Eur J Med Chem*, vol. 229, p. 114046, Feb. 2022, doi: 10.1016/J.EJMECH.2021.114046.
- [29] N. Kitamura *et al.*, 'Expedited Approach toward the Rational Design of Noncovalent SARS-CoV-2 Main Protease Inhibitors', *J Med Chem*, vol. 65, no. 4, pp. 2848–2865, Feb. 2022, doi: 10.1021/ACS.JMEDCHEM.1C00509/SUPPL\_FILE/JM1C00509\_SI\_002.CSV.
- [30] C. Ma *et al.*, 'Discovery of Di- and Trihaloacetamides as Covalent SARS-CoV-2 Main Protease Inhibitors with High Target Specificity', *J Am Chem Soc*, vol. 143, no. 49, pp. 20697–20709, Dec. 2021, doi: 10.1021/jacs.1c08060.

- [31] D. Yamane *et al.*, 'Selective covalent targeting of SARS-CoV-2 main protease by enantiopure chlorofluoroacetamide', *Chem Sci*, vol. 13, no. 10, pp. 3027–3034, 2022, doi: 10.1039/D1SC06596C.
- [32] M. Xiong, T. Nie, Q. Shao, M. Li, H. Su, and Y. Xu, 'In silico screening-based discovery of novel covalent inhibitors of the SARS-CoV-2 3CL protease', *Eur J Med Chem*, vol. 231, p. 114130, Mar. 2022, doi: 10.1016/j.ejmech.2022.114130.
- [33] A. Clyde *et al.*, 'High-Throughput Virtual Screening and Validation of a SARS-CoV-2 Main Protease Noncovalent Inhibitor', *J Chem Inf Model*, vol. 62, no. 1, pp. 116–128, Jan. 2022, doi: 10.1021/ACS.JCIM.1C00851/ASSET/IMAGES/LARGE/CI1C00851\_0005.JPEG.
- [34] S. Gao *et al.*, 'Discovery and Crystallographic Studies of Trisubstituted Piperazine Derivatives as Non-Covalent SARS-CoV-2 Main Protease Inhibitors with High Target Specificity and Low Toxicity', *J Med Chem*, vol. 65, no. 19, pp. 13343–13364, Oct. 2022, doi: 10.1021/ACS.JMEDCHEM.2C01146/SUPPL\_FILE/JM2C01146\_SI\_002.CSV.
- [35] S. Gao *et al.*, 'Discovery and Crystallographic Studies of Nonpeptidic Piperazine Derivatives as Covalent SARS-CoV-2 Main Protease Inhibitors', *J Med Chem*, vol. 65, no. 24, pp. 16902–16917, Dec. 2022, doi: 10.1021/ACS.JMEDCHEM.2C01716/SUPPL\_FILE/JM2C01716\_SI\_001.CSV.
- [36] P. Moon *et al.*, 'Discovery of Potent Pyrazoline-Based Covalent SARS-CoV-2 Main Protease Inhibitors', *bioRxiv*, p. 2022.03.05.483025, Mar. 2022, doi: 10.1101/2022.03.05.483025.
- [37] L. El Khoury *et al.*, 'Computationally driven discovery of SARS-CoV-2 Mpro inhibitors: from design to experimental validation', *Chem Sci*, vol. 13, no. 13, pp. 3674–3687, Mar. 2022, doi: 10.1039/D1SC05892D.
- [38] L. Zhang *et al.*, 'Crystal structure of SARS-CoV-2 main protease provides a basis for design of improved  $\alpha$ -ketoamide inhibitors', *Science (1979)*, vol. 368, no. 6489, pp. 409–412, Apr. 2020, doi: 10.1126/science.abb3405.
- [39] B. X. Quan *et al.*, 'An orally available Mpro inhibitor is effective against wild-type SARS-CoV-2 and variants including Omicron', *Nature Microbiology* 2022 7:5, vol. 7, no. 5, pp. 716–725, Apr. 2022, doi: 10.1038/s41564-022-01119-7.
- [40] X. Chen *et al.*, 'Inhibition mechanism and antiviral activity of an  $\alpha$ -ketoamide based SARS-CoV-2 main protease inhibitor', *bioRxiv*, p. 2023.03.09.531862, Mar. 2023, doi: 10.1101/2023.03.09.531862.
- [41] C. Huang *et al.*, 'A new generation Mpro inhibitor with potent activity against SARS-CoV-2 Omicron variants', *Signal Transduction and Targeted Therapy* 2023 8:1, vol. 8, no. 1, pp. 1–13, Mar. 2023, doi: 10.1038/s41392-023-01392-w.
- [42] Z. Jin *et al.*, 'Structure of Mpro from SARS-CoV-2 and discovery of its inhibitors', *Nature* 2020 582:7811, vol. 582, no. 7811, pp. 289–293, Apr. 2020, doi: 10.1038/s41586-020-2223-y.
- [43] S. Iketani *et al.*, 'Lead compounds for the development of SARS-CoV-2 3CL protease inhibitors', *Nature Communications* 2021 12:1, vol. 12, no. 1, pp. 1–7, Apr. 2021, doi: 10.1038/s41467-021-22362-2.
- [44] G. Amendola *et al.*, 'Lead Discovery of SARS-CoV-2 Main Protease Inhibitors through Covalent Docking-Based Virtual Screening', *J Chem Inf Model*, vol. 61, no. 4, pp. 2062–2073, Apr. 2021, doi: 10.1021/acs.jcim.1c00184.
- [45] S. Previti *et al.*, 'Structure-based lead optimization of peptide-based vinyl methyl ketones as SARS-CoV-2 main protease inhibitors', *Eur J Med Chem*, vol. 247, p. 115021, Feb. 2023, doi: 10.1016/j.ejmech.2022.115021.
- [46] S. Mondal *et al.*, 'Dual Inhibitors of Main Protease (M<sup>Pro</sup>) and Cathepsin L as Potent Antivirals against SARS-CoV2', *J Am Chem Soc*, vol. 144, no. 46, pp. 21035–21045, Nov. 2022, doi: 10.1021/jacs.2c04626.
- [47] A. Citarella *et al.*, 'Synthesis of SARS-CoV-2 Mpro inhibitors bearing a cinnamic ester warhead with in vitro activity against human coronaviruses', *Org Biomol Chem*, 2023, doi: 10.1039/D3OB00381G.

- [48] D. Zaidman, P. Gehrtz, M. Filep, M. A. Walsh, F. Von Delft, and N. London Correspondence, 'An automatic pipeline for the design of irreversible derivatives identifies a potent SARS-CoV-2 M pro inhibitor', *Cell Chem Biol*, vol. 28, pp. 1795-1806.e5, 2021, doi: 10.1016/j.chembiol.2021.05.018.
- [49] M. Kuzikov *et al.*, 'Identification of Inhibitors of SARS-CoV-2 3CL-Pro Enzymatic Activity Using a Small Molecule in Vitro Repurposing Screen', *ACS Pharmacol Transl Sci*, vol. 4, no. 3, pp. 1096–1110, Jun. 2021, doi: 10.1021/ACSPTSCI.0C00216/ASSET/IMAGES/LARGE/PT0C00216\_0007.JPEG.
- [50] H. Su *et al.*, 'Identification of pyrogallol as a warhead in design of covalent inhibitors for the SARS-CoV-2 3CL protease', *Nature Communications* 2021 12:1, vol. 12, no. 1, pp. 1–12, Jun. 2021, doi: 10.1038/s41467-021-23751-3.
- [51] S. I. Hattori *et al.*, 'GRL-0920, an indole chloropyridinyl ester, completely blocks SARS-CoV-2 infection', *mBio*, vol. 11, no. 4, pp. 1–16, Jul. 2020, doi: 10.1128/MBIO.01833-20/ASSET/11D12B15-E56A-4381-A5F9-AD6A79F97BE2/ASSETS/GRAPHIC/MBIO.01833-20-F0005.JPEG.
- [52] A. K. Ghosh *et al.*, 'Indole Chloropyridinyl Ester-Derived SARS-CoV-2 3CLpro Inhibitors: Enzyme Inhibition, Antiviral Efficacy, Structure-Activity Relationship, and X-ray Structural Studies', *J Med Chem*, vol. 64, no. 19, pp. 14702–14714, Oct. 2021, doi: 10.1021/ACS.JMEDCHEM.1C01214/SUPPL\_FILE/JM1C01214\_SI\_002.CSV.
- [53] J. Breidenbach *et al.*, 'Targeting the Main Protease of SARS-CoV-2: From the Establishment of High Throughput Screening to the Design of Tailored Inhibitors', *Angewandte Chemie International Edition*, vol. 60, no. 18, pp. 10423–10429, Apr. 2021, doi: 10.1002/ANIE.202016961.
- [54] T. Pillaiyar *et al.*, 'Small-Molecule Thioesters as SARS-CoV-2 Main Protease Inhibitors: Enzyme Inhibition, Structure–Activity Relationships, Antiviral Activity, and X-ray Structure Determination', *J Med Chem*, vol. 65, no. 13, pp. 9376–9395, Jul. 2022, doi: 10.1021/acs.jmedchem.2c00636.
- [55] M. Zmudzinski *et al.*, 'Ebselen derivatives are very potent dual inhibitors of SARS-CoV-2 proteases - PLpro and Mpro in in vitro studies', *bioRxiv*, p. 2020.08.30.273979, Aug. 2020, doi: 10.1101/2020.08.30.273979.
- [56] S. Huff *et al.*, 'Discovery and Mechanism of SARS-CoV-2 Main Protease Inhibitors', *J Med Chem*, vol. 65, no. 4, pp. 2866–2879, Feb. 2022, doi: 10.1021/ACS.JMEDCHEM.1C00566/SUPPL\_FILE/JM1C00566\_SI\_001.CSV.
- [57] K. Amporndanai *et al.*, 'Inhibition mechanism of SARS-CoV-2 main protease by ebselen and its derivatives', *Nature Communications* 2021 12:1, vol. 12, no. 1, pp. 1–7, May 2021, doi: 10.1038/s41467-021-23313-7.
- [58] L. Y. Sun *et al.*, 'Ebsulfur and Ebselen as highly potent scaffolds for the development of potential SARS-CoV-2 antivirals', *Bioorg Chem*, vol. 112, p. 104889, Jul. 2021, doi: 10.1016/J.BIOORG.2021.104889.
- [59] W. Chen *et al.*, 'Discovery of highly potent SARS-CoV-2 Mpro inhibitors based on benzoisothiazolone scaffold', *Bioorg Med Chem Lett*, vol. 58, p. 128526, Feb. 2022, doi: 10.1016/j.bmcl.2022.128526.
- [60] Y. Unoh *et al.*, 'Discovery of S-217622, a Noncovalent Oral SARS-CoV-2 3CL Protease Inhibitor Clinical Candidate for Treating COVID-19', *J Med Chem*, vol. 65, no. 9, pp. 6499–6512, May 2022, doi: 10.1021/acs.jmedchem.2c00117.
- [61] J. Yang *et al.*, 'Structure-Based Discovery of Novel Nonpeptide Inhibitors Targeting SARS-CoV-2 M<sup>pro</sup>', *J Chem Inf Model*, vol. 61, no. 8, pp. 3917–3926, Aug. 2021, doi: 10.1021/acs.jcim.1c00355.
- [62] S. H. Han *et al.*, 'Structure-Based Optimization of ML300-Derived, Noncovalent Inhibitors Targeting the Severe Acute Respiratory Syndrome Coronavirus 3CL Protease (SARS-CoV-2 3CLpro)', *J Med Chem*, vol. 65, no. 4, pp. 2880–2904, Feb. 2022, doi: 10.1021/ACS.JMEDCHEM.1C00598/SUPPL\_FILE/JM1C00598\_SI\_002.CSV.
- [63] S. A. Elseginy *et al.*, 'Promising anti-SARS-CoV-2 drugs by effective dual targeting against the viral and host proteases', *Bioorg Med Chem Lett*, vol. 43, p. 128099, Jul. 2021, doi: 10.1016/J.BMCL.2021.128099.

- [64] A. Luttens *et al.*, 'Ultralarge Virtual Screening Identifies SARS-CoV-2 Main Protease Inhibitors with Broad-Spectrum Activity against Coronaviruses', *J Am Chem Soc*, vol. 144, no. 7, pp. 2905–2920, Feb. 2022, doi: 10.1021/JACS.1C08402/ASSET/IMAGES/LARGE/JA1C08402\_0004.JPEG.
- [65] G. G. Rossetti *et al.*, 'Non-covalent SARS-CoV-2 Mpro inhibitors developed from in silico screen hits', *Scientific Reports* 2022 12:1, vol. 12, no. 1, pp. 1–9, Feb. 2022, doi: 10.1038/s41598-022-06306-4.
- [66] K. Zhang *et al.*, 'Discovery of quinazolin-4-one-based non-covalent inhibitors targeting the severe acute respiratory syndrome coronavirus 2 main protease (SARS-CoV-2 Mpro)', *Eur J Med Chem*, vol. 257, p. 115487, Sep. 2023, doi: 10.1016/j.ejmech.2023.115487.
- [67] A. Citarella *et al.*, 'Discovery of a Novel Trifluoromethyl Diazirine Inhibitor of SARS-CoV-2 Mpro', *Molecules*, vol. 28, no. 2, Jan. 2023, doi: 10.3390/MOLECULES28020514.
- [68] H. A. Alhadrami *et al.*, 'Neoechinulin A as a Promising SARS-CoV-2 Mpro Inhibitor: In Vitro and In Silico Study Showing the Ability of Simulations in Discerning Active from Inactive Enzyme Inhibitors', *Mar Drugs*, vol. 20, no. 3, p. 163, Mar. 2022, doi: 10.3390/MD20030163/S1.
- [69] Y. Zhang *et al.*, 'Structure-Based Discovery and Structural Basis of a Novel Broad-Spectrum Natural Product against the Main Protease of Coronavirus', *J Virol*, vol. 96, no. 1, pp. 1253–1274, Jan. 2022, doi: 10.1128/JVI.01253-21/SUPPL\_FILE/JVI.01253-21-S0001.PDF.
- [70] J. W. Zhang *et al.*, 'Discovery of 9,10-dihydrophenanthrene derivatives as SARS-CoV-2 3CLpro inhibitors for treating COVID-19', *Eur J Med Chem*, vol. 228, p. 114030, Jan. 2022, doi: 10.1016/J.EJMECH.2021.114030.
- [71] S. K. Samrat *et al.*, 'Allosteric inhibitors of the main protease of SARS-CoV-2', *Antiviral Res*, vol. 205, p. 105381, Sep. 2022, doi: 10.1016/j.antiviral.2022.105381.
- [72] O. A. Chaves *et al.*, 'Apixaban, an orally available anticoagulant, inhibits SARS-CoV-2 replication and its major protease in a non-competitive way', *J Mol Cell Biol*, vol. 14, no. 6, Aug. 2022, doi: 10.1093/jmcb/mjac039.
